1 **Which assessments are used to analyze neuromuscular control after an**  
2 **anterior cruciate ligament injury to determine readiness to return to sports? A**  
3 **systematic review**

4

5 Angela Blasimann<sup>a,b,\*</sup>, Irene Koenig<sup>a</sup>, Isabel Baert<sup>b</sup>, Heiner Baur<sup>a</sup>, Dirk Vissers<sup>b</sup>

6 <sup>a</sup>Bern University of Applied Sciences, Department of Health Professions, Division of  
7 Physiotherapy, Murtenstrasse 10, Bern CH-3008, Switzerland

8 <sup>b</sup>University of Antwerp, Faculty of Medicine and Health Sciences, Department of  
9 Rehabilitation Sciences and Physiotherapy, Campus Drie Eiken, Universiteitsplein 1,  
10 Wilrijk B-2610, Belgium

11 E-Mail addresses: [angela.blasimann@bfh.ch](mailto:angela.blasimann@bfh.ch) (A. Blasimann); [irene.koenig@bfh.ch](mailto:irene.koenig@bfh.ch) (I.  
12 Koenig); [isabel.baert@uantwerpen.be](mailto:isabel.baert@uantwerpen.be) (I. Baert); [heiner.baur@bfh.ch](mailto:heiner.baur@bfh.ch) (H. Baur);  
13 [dirk.vissers@uantwerpen.be](mailto:dirk.vissers@uantwerpen.be) (D. Vissers)

14

15 \*Corresponding author:

16 Bern University of Applied Sciences

17 Department of Health Professions

18 Angela Blasimann

19 Murtenstrasse 10

20 CH-3008 Bern

21 Phone: +41 31 848 45 27

22 E-Mail: [angela.blasimann@bfh.ch](mailto:angela.blasimann@bfh.ch)

23

24 Registration number in PROSPERO: CRD42019122188

25 Link to preprint: <https://medrxiv.org/cgi/content/short/2020.03.05.20031617v1>

26 **Abstract**

27 *Background:* Adequate neuromuscular control of the knee could be one element to  
28 prevent secondary injuries after an anterior cruciate ligament (ACL) injury. However,  
29 it is unclear which measurements should be used for a safe return to sports (RTS).  
30 Therefore, we aimed to summarize assessments for neuromuscular control of the  
31 knee after an ACL injury to decide upon readiness for RTS.

32 *Methods:* The systematic review followed the guidelines of Preferred Reporting of  
33 Items for Systematic Reviews and Meta-analyses (PRISMA) and has been listed in  
34 PROSPERO. The search in MEDLINE/PubMed, EMBASE, CINAHL, Cochrane  
35 Library, Physiotherapy Evidence Database, SPORTDiscus and the Web of Science  
36 yielded to studies identifying assessments using electromyography (EMG) for  
37 neuromuscular control during dynamic activities in patients with an ACL injury. Risk  
38 of bias was assessed with a modified Downs and Black checklist.

39 *Results:* A total of 1178 records were identified through database search. After  
40 screening, 31 articles could be included for analysis. Another 6 articles could be  
41 included from hand search of reference lists of the included articles, resulting in a  
42 total of 37 articles. EMG was used in all studies as method to assess neuromuscular  
43 control. Risk of bias was medium to high due to an unclear description of participants  
44 and prior interventions, confounding factors and incompletely reported results.

45 *Conclusion:* Despite a wide range of EMG outcome measures for neuromuscular  
46 control, none was used to decide upon a safe RTS in ACL patients. Future studies  
47 should aim at finding valid and reliable assessments for RTS in ACL patients.

48

49 **Keywords:** knee, anterior cruciate ligament, electromyography, assessment,  
50 neuromuscular control, return to sports

51

52

53

54

55

56

57

58

59

60

61

62

63

64

65

66

67 Abbreviations: ACL = anterior cruciate ligament; ACL-R; anterior cruciate ligament

68 reconstruction; EMG = electromyography; LSI = Limb Symmetry Index; RTS = return

69 to sports; TAS = Tegner Activity Score

## 70        **1. Introduction**

71        Anterior cruciate ligament (ACL) injuries happen quite frequently and concern  
72        athletes (0.15 injuries per 1000 athletic exposures (AEs)) but also the active part of  
73        the general population [1,2]. Most ACL injuries are due to a non-contact, multiplane  
74        mechanism [3] and may lead to instability, secondary meniscal injury or even knee  
75        osteoarthritis in the long run [4]. Consequently, this injury means several weeks or  
76        even months of physical impairment with wide consequences for the patients  
77        concerning return to work, return to activity or return to sport (RTS). Overall, the  
78        recurrence rates even after successful surgery and subsequent rehabilitation are high  
79        (29.5% or 1.82/1000 AEs), with a tear of the ACL graft (9.0%), an ACL injury of the  
80        opposite leg (20.5%), muscle injuries on the ipsilateral side or even bilateral  
81        consequences [5,6].

82        Approximately 90% of patients with an ACL reconstruction (ACL-R) achieve  
83        successful surgical outcomes (impairment-based measures of knee function) and  
84        85% show successful outcome in terms of activity-based measures [7]. More than  
85        80% of these patients return to some form of sports, however, only 44% return to  
86        competition [7]. Other authors reported RTS values between 63 and 97% for elite  
87        athletes with an ACL-R [8]. Of these athletes, more than 5% sustained a re-rupture of  
88        the graft [8,9] in the ipsilateral knee. The risk for an ACL tear in the contralateral knee  
89        was as double as high (11.8%) five years or longer after an ACL-R [9]. It is known  
90        that returning to high-demanding sports (including jumping, pivoting and hard cutting)  
91        after ACL-R leads to a more than fourfold increase in reinjury rates over two years  
92        [10]. Considering simple decision rules such as RTS not before nine months  
93        postoperatively and achievement of symmetrical quadriceps strength was reported to  
94        substantially decrease reinjury rates [10].

95 Most elite athletes RTS on average within 12 months [8] – this population seems to  
96 return earlier than non-elite athletes [7]. However, it remains unclear whether this  
97 approach is safe [8]. To measure functional performance after ACL-R, mainly the  
98 single leg hop test for distance or a combination of several hop tests are used, and  
99 functional performance is expressed with the Lower Limb Symmetry Index (LSI) [11].  
100 However, the LSI may overestimate the time point of RTS and therefore increase risk  
101 for secondary injury [12]. Furthermore, often used clinical impairment assessments  
102 for disability do not appear to be related to measured physical performance [13] and  
103 do not necessarily reflect readiness for RTS [14]. Moreover, no measure for  
104 assessing quality of functional performance after ACL-R has been reported so far  
105 [11,15].

106 Regarding the determination of RTS after ACL-R, there is some evidence for the use  
107 of functional performance tests: Multiple functional performance measures – a battery  
108 including strength and hop tests, quality of movement and psychological tests [15] -  
109 might be more useful for the determination of RTS than a single performance  
110 measure [16]. However, it is still unclear, which measures should be used to bring  
111 athletes safely back to RTS with a low risk of a second ACL injury [15].

112 It is known that patients with ACL-R show altered kinematics and kinetics [17] - these  
113 changes are referred to neuromuscular adaptations due to altered sensorimotor  
114 control [18]. These changes in sensorimotor control are caused by altered afferent  
115 inputs to the central nervous system due to the loss of the mechanoreceptors of the  
116 native (original) ACL [19]. Furthermore, patients with a deficient ACL show different  
117 neuromuscular strategies during walking [20], depending on the functional activity  
118 level and being copers or non-copers.

119 Neuromuscular control is defined and used in different ways: Biomechanical  
120 measures such as three-dimensional kinetics and kinematics are used to predict ACL  
121 injury risk [21] or physical performance test batteries (including strength tests, hop  
122 tests and measurement of quality of movement) are used to clear an athlete for RTS  
123 [15]. So far, physical performance tests including jumps and tests of muscle function  
124 [12] are often used in daily clinical practice to assess neuromuscular control.  
125 However, there is only limited evidence that passing RTS test batteries reduces the  
126 risk for a second ACL injury [22].

127 Three-dimensional kinetics and kinematics provide some data to judge upon quality  
128 of active knee stability (“dynamic valgus”), however, give only little insight in  
129 neuromuscular control. In addition, the currently suggested RTS criteria do not seem  
130 to be adequate to assess neuromuscular control of the knee joint to judge upon a  
131 safe RTS or even competition. Consequently, meaningful, reliable, valid and accurate  
132 diagnostic tools for patients with an ACL injury (either treated surgically or  
133 conservatively) are needed and may aid clinical decision-making to optimize sports  
134 participation following ACL-R [23]. Objective measurements of neuromuscular control  
135 should include electromyography (EMG) of involved muscles to judge upon quantity,  
136 quality and timing of voluntary activation and reflex activity [17,24,25]. So far, it is  
137 unclear which measurements for neuromuscular control are used in patients with an  
138 ACL injury to clear for RTS.

139 Therefore, the first aim of this systematic review was to summarize the scientific  
140 literature regarding assessments for neuromuscular control in patients with an ACL  
141 injury (either treated surgically or conservatively). The second aim was to analyze  
142 whether these assessments for neuromuscular control were used to decide upon  
143 readiness for RTS in these patients.

144

145

## 146 **2. Material and methods**

### 147 **2.1. Design, protocol and registration**

148 This systematic review was planned, conducted and analyzed according to the  
149 guidelines of Preferred Reporting of Items for Systematic Reviews and Meta-  
150 Analyses (PRISMA) [26] and followed the recommendations of Cochrane group [27].

151 The protocol for this systematic review was registered beforehand in the International  
152 prospective register of systematic reviews (PROSPERO) from the National Institute  
153 for Health Research (<https://www.crd.york.ac.uk/PROSPERO/index.php#index.php>)  
154 and got the registration number CRD42019122188.

### 155 **2.2. Eligibility criteria**

156 To define the relevant key words for the literature search, the PICOS strategy was  
157 used as follows (Table1):

158 Table 1: Overview of PICOS criteria for key word definitions

159 *Insert Table 1 about here.*

160 In addition, the following inclusion and exclusion criteria were applied: As inclusion  
161 criteria were used: Study participants have to be athletes or physically active people  
162 who participate in sports activities on a regular basis (as defined by each study, e.g.  
163 Tegner Activity Score (TAS)  $\geq 3$ ) to get data to decide upon RTS, assessments for  
164 neuromuscular control of lower limb muscles using EMG as method, original articles  
165 published in peer-reviewed, scientific journals in English, German, French, Italian or  
166 Dutch, without any restriction regarding publication date or year and available as full  
167 texts could be included. Exclusion criteria were studies with model-driven

168 approaches, animals, cadavers, comparisons of surgical techniques, passive or non-  
169 functional tasks (such as isokinetic measurements for strength and isometric muscle  
170 activity), editorials, conference abstracts, book chapters, theses, systematic reviews  
171 and meta-analyses.

### 172 **2.3. Information sources**

173 The search was effectuated in the electronic databases MEDLINE/PubMed,  
174 EMBASE, CINAHL, Cochrane Library, Physiotherapy Evidence Database (PEDro),  
175 SPORTDiscus and in the Web of Science. Furthermore, a hand search was done  
176 using the reference lists of included articles to identify additional and potentially  
177 eligible articles that had been missed in the electronic database search. To ensure  
178 new articles matching the search terms, e-mail alerts were established from each of  
179 the databases if possible [28]. The hits from these two additional sources were also  
180 screened for eligibility applying the same criteria as for the articles from the database  
181 search.

### 182 **2.4. Search**

183 The search was executed based on the inclusion and exclusion criteria in all 7  
184 electronic sources mentioned above from inception until March 15<sup>th</sup>, 2019. In all  
185 sources, the advanced search mode was used if available. A search matrix  
186 combining relevant keywords (if possible MeSH-terms) with the Boolean operators  
187 AND and OR was used and customized for searches in all databases if necessary  
188 (see Appendix A): “anterior cruciate ligament/anterior cranial cruciate ligament/ACL”;  
189 “anterior cruciate ligament injuries/strains and sprains/rupture/tear/injury/deficiency”;  
190 “anterior ligament reconstruction/anterior cruciate ligament/surgery/reconstructive  
191 surgical procedures/orthopedic procedure/orthopedic procedure/tendon graft/tendon



192 transfer/conservative treatment/non-surgical/rehabilitation/physical therapy  
193 modalities/physiotherapy/kinesiotherapy/ exercise/ instruction/resistance  
194 training/neuromuscular training/postoperative care”; “neuromuscular  
195 control/neuromuscular activity/sensorimotor control/muscle activity/active stability”;  
196 “electromyography/EMG/electromyogram/amplitude/timing/mean activity/peak  
197 activity/duration of activity/onset/offset/on-off-pattern/pre-activity/latency/reflex  
198 response”.

## 199 **2.5. Study selection**

200 All hits obtained by the database searches were downloaded to the Rayyan  
201 reference management platform ([rayyan.qcri.org](http://rayyan.qcri.org)) and inserted into EndNote  
202 (Clarivate Analytics, Philadelphia, USA). Prior to screening, duplicates were  
203 removed. Two authors (AB and IK) screened title and abstract of the records, one by  
204 using the software EndNote (Clarivate Analytics, Philadelphia, USA) and the other  
205 with the help of the free software “rayyan” [29]. If in- or exclusion of the record was  
206 unclear, the full text was read, and in-/exclusion criteria were applied. Two authors  
207 (IK, AB) independently decided upon in- or exclusion of all studies; if their decisions  
208 did not match, discussion took place until consensus was achieved. If consensus  
209 would not have been achieved, a third author (IB or HB) would have finally decided  
210 upon in- or exclusion of the record in question; however, this was not necessary.

## 211 **2.6. Risk of bias across studies**

212 The risk of bias of all the included articles was independently assessed by two raters  
213 (AB, IK) by using the Downs and Black checklist [30] in a modified form [28,31]. For  
214 this systematic review, studies with a total score of 17 or above out of 25 (more than  
215 2/3 of the maximum total score) were considered as being of high methodological

216 quality, low risk of bias respectively [28]. Studies which reached 13 to 16 points  
217 (more than 50% of the maximum total score) were rated as being of medium quality,  
218 and total scores below 13 were rated as being of low methodological quality, high risk  
219 of bias respectively. As the aim of this systematic review was to summarize the  
220 applied measures for neuromuscular control, the methodological quality of the  
221 included studies was of secondary interest. Therefore, no study was excluded due to  
222 a low total score in the risk of bias assessment.

### 223 **2.7. Data collection process**

224 After final decision of all studies, data extraction for each eligible study was  
225 performed by the first author (AB) with predefined Microsoft® Excel (Microsoft  
226 Corporation, Redmond WA, USA) spreadsheet. As all included studies were  
227 available as full texts and the provided data were enough for the systematic review,  
228 no authors had to be contacted in order to obtain or confirm data. The first author  
229 (AB) extracted necessary information from each article describing the study design,  
230 groups measured and their characteristics, the tasks to be fulfilled by all participants,  
231 and all assessments or methods used to evaluate neuromuscular control.  
232 Furthermore, the chosen assessment for neuromuscular control were judged whether  
233 they were used to clear the participants for RTS. The second author (IK) controlled  
234 the extracted data at random.

### 235 **3. Results**

236 Initially, a total of 1178 records were identified through database search. After  
237 deduplication, 946 remaining articles were screened for title and abstract. Fifty-eight  
238 articles were fully read and assessed for eligibility. From the database search, a total  
239 of 31 articles, mainly cross-sectional, case-controlled studies, were included for  
240 qualitative analysis. Furthermore, a hand search in the reference lists of included  
241 articles yielded to another six hits which could be included. E-mail alerts provided five  
242 articles, however, none of them met the inclusion criteria. Reasons for exclusion were  
243 participants younger than 18 years, not able to achieve RTS, time since injury or  
244 surgery less than six months, static or non-functional task, study design (e.g.  
245 systematic review, study protocol), unclear or inadequate outcome, healthy  
246 participants or without ACL injury. Details about every step of the search are  
247 illustrated in the following flowchart (Fig.1).

248 *Insert Fig. 1 about here.*

249 Fig. 1: Flowchart of literature search according to guidelines of Preferred Reporting of Items for Systematic Reviews and Meta-  
250 Analyses (PRISMA) [26]

#### 251 **3.1. Risk of bias assessment**

252 Risk of bias of approximately half (18 studies, 48.6%) of the included studies was  
253 medium [17,32-48], six (16.2%) showed high methodological quality [49-54] and 13  
254 studies (35.1%) were of low quality [55-67] (Table 2). The main reasons for a medium  
255 to low methodological quality were due to an unclear description of participants and  
256 prior interventions, confounding factors, and incompletely reported results.

257 Table 2: Risk of Bias assessment with the adapted Downs & Black checklist [28,30,31]

258 *Insert Table 2 about here.*

### 259        **3.2. Characteristics of included studies**

260 All included studies were case-control studies, except two which were case series  
261 [54] or a single-case study [67]. Two reported a retrospective or secondary data  
262 analysis [50,53] or provided a subgroup analysis from a larger trial [42,45-47,63-65].  
263 Thirty-four studies compared the ACL participants with at least one control group  
264 (other ACL treatment, e.g. surgical versus conservative, or healthy controls), the  
265 remaining three studies made a comparison between the injured and the non-injured  
266 leg of the participants [40,43] or compared the pre-injury status with follow-up data  
267 from pre- and post-surgery [67].

268 The number of included, adult participants with ACL injury varied from N = 1 [67] to a  
269 maximum of N = 70 [60] with a wide range of described physical activity from  
270 “normal” [56], “regular” [62], “active in at least one sport” [59], TAS  $\geq$  3 [48], minimal  
271 2h/week [32,33] to athletes at level I sports including jumping, pivoting and hard  
272 cutting [40,55,57], elite soccer players [34,36,65,67] or elite skiers [48].

273 Some authors restricted study participation to either males [32,33,35-37,42-  
274 44,56,58,65] or females [48,49,62-64,66,67], others measured females and males  
275 [17,34,38,39,45-47,50,52-55,57,59,60]. Three studies did not provide any data about  
276 the gender of their participants [40,51,61]. More patient characteristics of included  
277 studies can be found in Table B.1 (Appendix B).

278 All included studies used surface EMG as method to assess neuromuscular control  
279 and provided EMG-related variables such as peak and mean amplitudes, timing and  
280 peak of muscle activity, preparatory and reactive muscle activity, on- and offset of  
281 muscular activation, co-activation/co-contraction ratios, or asymmetry index. The  
282 outcome variables were expressed as percentage of maximum voluntary (isometric)

283 contraction (%MVIC or %MVC) or reported in microvolts or milliseconds according to  
284 the variable chosen in amplitude or time domain.

285 The number of muscles assessed ranged from one [42,59] to ten [57]. Mainly muscle  
286 activity of four muscles of the thigh, vastus lateralis, vastus medialis, biceps femoris  
287 and semitendinosus, had been assessed. However, there were also studies  
288 measuring the adductor longus [37,60], gluteus medius [37,63,64], gluteus maximus  
289 [39,50,52,53,54,57,63,64], and calf muscles such as soleus, medial and lateral  
290 gastrocnemius [45,46,47,52,53,54,57,58,61]. The tasks used were very diverse:  
291 there were activities of daily life such as walking on even ground and downhill [32,45,  
292 51,55,56,60,61,66], and stair climbing [17,47]. Other activities went more towards  
293 sports such as running [42,43,58,65,66] and jumping  
294 [35,37,38,39,40,46,48,49,50,52,53,54,57,59,63,64,66] where mainly the single-leg  
295 jump for distance, drop jumps and countermovement jumps were used. Some  
296 authors chose typical rehabilitation exercises such as forward lunges [33], Nordic  
297 hamstrings or hamstrings curls [34] and squats [62]. At the other end of the scale,  
298 more complex, highly demanding, sport-specific tasks such as an instep soccer kick  
299 [36] or a sidecutting maneuver [67] were reported. Only few research groups used  
300 perturbation platforms to simulate injury mechanisms during walking [51] or squatting  
301 [44,62], or applied devices to stress the ACL in the posterior-anterior direction [48]. In  
302 addition, two studies even investigated the influence of fatigue on neuromuscular  
303 control [39,50].

304 Details regarding methodological aspects of all included studies can be found in  
305 Table B.2 (Appendix B).

### 306 **3.3. Decision for Return to Sports RTS**

307 None of the included studies used the surface EMG measurements to decide upon  
308 readiness for RTS (Table B.2 Appendix B). However, the results from about a third of  
309 the studies (32.4%, 12 studies) could provide useful information by the choice of the  
310 assessed groups such as copers versus non-copers [32,33,45,46,47,55], intervention  
311 and control group from the same team or level/league [34,36,38], data from pre-  
312 injury/pre-surgery including post-surgical follow up [60,67] or participants with full  
313 RTS versus limited RTS [51]. In addition, two studies even investigated the influence  
314 of fatigue on neuromuscular control [39,50].

## 315 **4. Discussion**

316 The aim of this systematic review was to summarize the scientific literature regarding  
317 assessments for neuromuscular control in patients with an ACL injury (either treated  
318 surgically or conservatively). The second aim was to analyze whether these  
319 assessments for neuromuscular control were used to decide upon readiness for RTS  
320 in these patients.

321 There were a lot of factors in the study population which could have an influence on  
322 neuromuscular control:

### 323 *Influence by type of comparison (intra- versus inter-subject)*

324 The use of the contralateral, non-injured leg in intra-subject comparison, without a  
325 “real” control group [40,43] may lead to an overestimation of the physical  
326 performance in the ACL-reconstructed (ACL-R) or -injured leg. After ACL-R,  
327 functional performance is often expressed with the LSI [11]. As the non-affected limb  
328 may also have deteriorated, the LSI may overestimate the right time for a safe RTS,  
329 and therefore, the risk for secondary injury may be higher [12]. In acutely injured ACL  
330 patients, intra-individual comparison showed bilateral consequences during stair  
331 ascent and indicates an alteration in the motor program (“pre-programmed activity”)  
332 [68]. In addition, in case of a case-controlled study design, the subjects in the control  
333 group should be matched to the ACL participants regarding sex, age, body mass,  
334 height, activity level and leg dominance.

### 335 *Influence by level of activity and fatigue*

336 Some of the included studies used very challenging, sports-specific task to assess  
337 neuromuscular control, some even assessed neuromuscular control after fatiguing  
338 tasks. It is known that most of ACL tears are non-contact injuries happening at the

339 end of a training session or a play [69]. Therefore, the closer the task to the sports  
340 and injury-risky situation, the safer the decision towards full RTS or even return to  
341 competition will be. However, assessing performance-based tests or movement  
342 quality may be more difficult to standardize, require more complex equipment and  
343 large amounts of space. But if only impairments will be tested, there will be a lack of  
344 information regarding an “athlete’s capacity to cope with the physical and mental  
345 demands of playing sport” [70]. It is therefore recommended to search for a  
346 standardized assessment close to the injury mechanism.

#### 347 *Influence by sex*

348 Not all included studies reported findings of mixed groups separately by gender.  
349 Some did not even state the sex of the participants. This could partly be explained by  
350 the date of publication as gender difference in ACL patients has not been in the focus  
351 of research 20 years before. But nowadays, a lot of facts concerning females are  
352 known: Female athletes are more likely to suffer from an ACL injury [21] than men:  
353 their increased risk is probably multifactorial. However, several studies indicate that  
354 hormonal factors play a role [3,71] contributing to an increased laxity of ligaments in  
355 the first half of the menstrual cycle. The higher risk for females to suffer from an ACL  
356 injury can be explained by motion and loading of the knee joint during performance  
357 [21]. The ligament dominance theory says that female athletes typically perform  
358 movements in sports with a greater knee valgus angle than men. Therefore, the  
359 amount of stress on the ACL in these situations is higher because there is a high  
360 activation of the quadriceps despite limited knee and hip flexion, greater hip  
361 adduction and a large knee adduction moment [72,73]. Moreover, females typically  
362 land with an internally or externally rotated tibia [74], leading to an increased knee  
363 valgus stress due to greater and more laterally orientated ground reaction forces [75].



364 Equal results in women and men were reported for outcomes such as anterior  
365 drawer, Pivot-Shift and Lachman test, hop tests, quadriceps or hamstring testing,  
366 International Knee Documentation Committee (IKDC) knee examination score and  
367 loss of range of motion [76]. However, female patients showed inferior, statistically  
368 significant subjective and functional outcomes such as laxity, revision rate, Lysholm  
369 score, TAS and incidence of not returning to sports.

370 *Influence* *by* *treatment*

371 The included studies reported different treatment options (ACL-R with different graft  
372 types, conservative treatment). Depending on the classification of the participants in  
373 copers and non-copers, the results in neuromuscular control may differ from a  
374 population of ACL-R participants. Therefore, all researchers who worked with copers  
375 and non-copers made intra- and inter-group comparisons without an ACL-R group. A  
376 Cochrane review revealed low evidence for no difference in young, active adults after  
377 two and five years after the injury, assessed with patient-reported outcomes.  
378 However, many participants with conservative treatments remain symptomatic (non-  
379 copers with unstable knee) and therefore, later opt for ACL surgery [77].  
380 Furthermore, the choice of graft would influence the neuromuscular control of  
381 measured muscles due to the morbidity of the harvesting site of the graft (e.g.  
382 hamstrings).

383 *EMG variables*

384 The provided EMG-related variables were in accordance to the ones mentioned in a  
385 systematic review searching for knee muscle activity in ACL-deficient patients and  
386 healthy controls during gait [20]. Another study summarized and quantitatively  
387 analyzed muscle onset activity prior to landing in patients after ACL injury [24] and  
388 provided values in milliseconds and in percentage of gait cycle as some of the

389 included studies did. However, some of the researchers only provided integrated  
390 EMG values which would make it difficult to be compared to other studies using the  
391 respective units (milliseconds, millivolts) or widely used percentage values (%MVIC,  
392 %MVC).

393 If the researchers mentioned the procedures for collecting EMG data, they referred to  
394 standardized applications and guidelines such as SENIAM [78].

#### 395 *Return to sports (RTS)*

396 Regarding the determination of RTS after ACL-R, there is some evidence for the use  
397 of functional performance tests, which had also been widely used in the included  
398 studies. Multiple functional performance measures – a battery including strength and  
399 hop tests, quality of movement and psychological tests [15] - might be more useful for  
400 the determination of RTS than a single performance measure. However, it is still  
401 unclear, which measures should be used to bring athletes safely back to RTS with a  
402 low risk of a second ACL injury [15]. Currently used RTS criteria or assessments,  
403 such as time, strength tests, hop tests, patient-reports, clinical examination, thigh  
404 circumference, ligamentous stability, range of motion, effusion and performance-  
405 based criteria, may be suboptimal at reducing the risk of a second ACL injury [70,79].

406 Recovery of neuromuscular function was mentioned to be important because of the  
407 existing connection between the variables time since surgery and the risk for re-injury  
408 of the knee joint; but adequate assessment procedures to assess neuromuscular  
409 function are still a matter of debate [10].

#### 410 **4.1. Limitations**

411 The sample size of all the studies was quite low, however, providing reasonable  
412 sample size calculations and depending on the variable investigated, the results were  
413 acceptable. Furthermore, the more restrictive the inclusion criteria for the

414 participants, the more homogeneous the intervention and the control groups were,  
415 but the more challenging the recruitment process was, leading to smaller groups to  
416 be investigated.

417 The used assessment for the risk of bias, the Downs and Black checklist [30] in a  
418 modified form [28,31] is designed for randomized and non-randomized controlled  
419 studies, however, the latter score lower in some items, get lower total scores and  
420 therefore a worse overall rating of the methodological quality. Despite this  
421 disadvantage, we decided to use the modified checklist as we could assess all  
422 studies with different designs included in this systematic review.

423

## 424 **5. Conclusions**

425 This systematic review summarized assessments with EMG variables for  
426 neuromuscular control of the knee in patients suffering from an ACL injury (either  
427 treated surgically or conservatively). Despite 37 articles providing a wide range of  
428 assessments for neuromuscular control, none was used to decide upon readiness  
429 towards a successful return to sports (RTS).

430 Therefore, additional studies are needed to define readiness towards RTS by  
431 assessing neuromuscular control in adult ACL patients. Future research should aim  
432 at finding reliable and valid, EMG-related variables to assess neuromuscular control  
433 close to the injury mechanism and as sport-specific as possible.

434 Moreover, clinicians should be aware of LSI problems (non-injured side is affected,  
435 probably not a good reference, pre-surgery/-injury scores would be perfect but not  
436 realistic in recreational athletes, probably in professional sports) and that physical  
437 performance batteries do not reflect neuromuscular control needed for a safe RTS.

438

439

#### 440 **Authors' contributions**

441 AB participated in the design of the study, contributed to data  
442 collection/reduction/analysis and interpretation of results; IK contributed to data  
443 collection/reduction/analysis; IB and DV participated in the design of the study; HB  
444 participated in the design of the study, contributed to data analysis and interpretation  
445 of results. All authors contributed to the manuscript writing, have read and approved  
446 the final version of the manuscript and agree with the order of authors as listed.

447

#### 448 **Declarations of interest**

449 None

450

#### 451 **Role of funding source**

452 This research did not receive any specific grant from funding agencies in the public,  
453 commercial, or not-for-profit sectors. However, the Bern University of Applied  
454 Sciences provided working hours for AB as grant for non-tenured staff, but was not  
455 involved in study design, collection, analysis and interpretation of data, writing the  
456 report and in the decision to submit the article for publication.

457

#### 458 **Acknowledgments**

459 This systematic review was mainly undertaken in the Bern University of Applied  
460 Sciences, but also in the library of the University of Bern (Institute for Sports

461 Science). We would like to thank to all the following people for their assistance and  
462 contribution regarding this work:

- 463 - the librarians of the Bern University (Department of Health Professions) and  
464 the University of Bern (Institute for Sports Science) for their support before and  
465 during the literature search
- 466 - Mariyam Akter, former scientific assistant at the Bern University of Applied  
467 Sciences (Department of Health Professions, Division of Physiotherapy), for  
468 her support in extracting relevant key words and
- 469 - Aglaja Busch, former master student at the Bern University of Applied  
470 Sciences (Department of Health Professions, Division of Physiotherapy), for  
471 her critical review of the proposal and help to refine the search strategy.

## 472 **References**

- 473 [1] Hootman JM, Dick R, Agel J. Epidemiology of collegiate injuries for 15 sports:  
474 summary and recommendations for injury prevention initiatives. *J Athl Train.*  
475 2007;42(2):311–9.
- 476 [2] Kaeding CC, Léger-St-Jean B, Magnussen RA. Epidemiology and diagnosis of  
477 anterior cruciate ligament injuries. *Clin Sports Med.* 2017;36(1):1-8.  
478 <https://doi.org/10.1016/j.csm.2016.08.001>
- 479 [3] Hewett TE, Zazulak BT, Myer GD. Effects of the menstrual cycle on anterior  
480 cruciate ligament injury risk: a systematic review. *Am J Sports Med.* 2007;35:659-68.
- 481 [4] Friel NA, Chu CR. The role of ACL injury in the development of posttraumatic  
482 knee osteoarthritis. *Clin Sports Med.* 2013;32(1):1–12.  
483 <https://doi.org/10.1016/j.csm.2012.08.017>.
- 484 [5] Paterno MV, Rauh MJ, Schmitt LC, Ford KR, Hewett TE. Incidence of Second  
485 ACL Injuries 2 Years After Primary ACL Reconstruction and Return to Sport  
486 [published online ahead of print April 21, 2014]. *Am J Sports Med.* 2014;42(7):1567-  
487 73. <https://doi.org/10.1177/0363546514530088>
- 488 [6] Paterno MV, Rauh MJ, Schmitt LC, Ford KR, Hewett TE. Incidence of  
489 Contralateral and Ipsilateral Anterior Cruciate Ligament (ACL) Injury After Primary  
490 ACL Reconstruction and Return to Sport. *Clin J Sport Med.* 2012;22(2):116–21.  
491 <https://doi.org/10.1097/JSM.0b013e318246ef9e>.
- 492 [7] Ardern CL, Webster KE, Taylor NF, Feller JA. Return to sport following anterior  
493 cruciate ligament reconstruction surgery: a systematic review and meta-analysis of  
494 the state of play. *Br J Sports Med.* 2011;45:596-606.
- 495 [8] Lai CCH, Feller JA, Webster KE. Fifteen-year audit of anterior cruciate ligament  
496 reconstructions in the Australian football league from 1999 to 2013: return to play and  
497 subsequent ACL injury. *Am J Sports Med.* 2018;46(14).  
498 <https://doi.org/10.1177/0363546518803932>.
- 499 [9] Wright RW, Magnussen RA, Dunn WR, Spindler KP. Ipsilateral Graft and  
500 Contralateral ACL Rupture at Five Years or More Following ACL Reconstruction. A  
501 Systematic Review. *J Bone Joint Surg Am.* 2011;93(12):1159–65.

- 502 [10] Grindem H, Snyder-Mackler L, Moksnes H, Engebretsen L, Risberg MA. Simple  
503 decision rules can reduce reinjury risk by 84% after ACL reconstruction: the  
504 Delaware-Oslo ACL cohort study. *Br J Sports Med.* 2016;50:804–8.
- 505 [11] van Melick N, van Cingel REH, Tijssen MPW, Nijhuis-van der Sanden MWG.  
506 Assessment of functional performance after anterior cruciate ligament reconstruction:  
507 a systematic review of measurement procedures. *Knee Surg Sports Traumatol*  
508 *Arthrosc.* 2013;21:869-79.
- 509 [12] Wellsandt E, Failla MJ, Snyder-Mackler L. Limb Symmetry Indexes can  
510 overestimate knee function after ACL injury. *J Orthop Sports Phys Ther.* 2017;Mar  
511 29:1-18. <https://doi.org/10.2519/jospt.2017.7285>.
- 512 [13] Mayer SW, Queen RM, Taylor D, Moorman CT, Toth AP, Garrett WE Jr, et al.  
513 Functional testing differences in anterior cruciate ligament reconstruction patients  
514 released versus not released to return to sport. *Am J Sports Med.* 2015;43(7):1648-  
515 55. <https://doi.org/10.1177/0363546515578249>.
- 516 [14] McGrath T, Waddington G, Scarvell JM, Ball N, Creer R, Woods K, et al. An  
517 ecological study of anterior cruciate ligament reconstruction, part 1. Clinical tests do  
518 not correlate with return-to-sports outcomes. *Orthop J Sports Med.* 4(11),  
519 2325967116672208. <https://doi.org/10.1177/2325967116672208>.
- 520 [15] van Melick N, van Cingel REH, Brooijmans F, Neeter C, van Tienen T, Hullegie  
521 W, et al. Evidence-based clinical practice update: practice guidelines for anterior  
522 cruciate ligament rehabilitation based on a systematic review and multidisciplinary  
523 consensus. *Br J Sports Med.* 2016;50:1506-15.
- 524 [16] Ardern CL, Glasgow P, Schneiders A, Witvrouw E, Clarsen B, Cools A, et al.  
525 2016 Consensus statement on return to sport from the First World Congress in  
526 Sports Physical Therapy, Bern. *Br J Sports Med.* 2016;50:853-64.
- 527 [17] Busch A, Blasimann A, Henle P, Baur H. Neuromuscular activity during stair  
528 descent in ACL reconstructed patients: A pilot study. *Knee.* 2019;26:310-16.
- 529 [18] Grooms DR, Page SJ, Nichols-Larsen DS, Chaudhari AMW, White SE, Onate  
530 JA. Neuroplasticity associated with anterior cruciate ligament reconstruction. *J*  
531 *Orthop Sports Phys Ther.* 2017; 47(3):180-9.

- 532 [19] Zimny ML, Schutte M, Dabezies E. Mechanoreceptors in the human anterior  
533 cruciate ligament. *Anat Rec.* 1986;214:204–9.
- 534 [20] Shanbehzadeh S, Bandpei MAM, Ehsani F. Knee muscle activity during gait in  
535 patients with anterior cruciate ligament injury: a systematic review of  
536 electromyographic studies. *Knee Surg Sports Traumatol Arthrosc.* 2017;25:1432–42.  
537 <https://doi.org/10.1007/s00167-015-3925-9>.
- 538 [21] Hewett TE, Myer GD, Ford KR, Heidt RS, Colosimo AJ, McLean SG, et al.  
539 Biomechanical measures of neuromuscular control and valgus loading of the knee  
540 predict anterior cruciate ligament injury risk in female athletes: a prospective study.  
541 *Am J Sports Med.* 2005;33(4):492–501. <https://doi.org/10.1177/0363546504269591>
- 542 [22] Webster KE, Feller JA. A research update on the state of play for return to sport  
543 after anterior cruciate ligament reconstruction. *J Orthop Traumatol.* 2019 Jan  
544 28;20(1):10. <https://doi.org/10.1186/s10195-018-0516-9>.
- 545 [23] Schmitt LC, Paterno MV, Ford KR, Myer GD, Hewett TE. Strength Asymmetry  
546 and Landing Mechanics at Return to Sport after Anterior Cruciate Ligament  
547 Reconstruction. *Med Sci Sports Exerc.* 2015;47(7):1426–34.  
548 <https://doi.org/10.1249/MSS.0000000000000560>.
- 549 [24] Theisen D, Rada I, Brau A, Gette P, Seil R. Muscle Activity Onset Prior to  
550 Landing in Patients after Anterior Cruciate Ligament Injury: A Systematic Review and  
551 Meta-Analysis. *PloS One.* Published online May 11, 2016.  
552 <https://doi.org/10.1371/journal.pone.0155277>
- 553 [25] Bruhn S, Leukel C, Gollhofer A. Differential effects of stimulus characteristics  
554 during knee joint perturbation on hamstring and quadriceps reflex responses. *Hum*  
555 *Move Sci* 2011;30:1079–91.
- 556 [26] Moher D, Liberati A, Tetzlaff J, Altman, D, PRISMA-Group. Preferred reporting  
557 items for systematic reviews and meta-analyses: the PRISMA statement. *PLoS Med.*  
558 2009;6(7): e1000097. <https://doi.org/10.1371/journal.pmed.1000097>.
- 559 [27] Higgins JPT, Green S, eds. *Cochrane handbook for systematic reviews of*  
560 *interventions.* Chichester UK: Wiley-Blackwell; 2008.



- 561 [28] Ramsey CA, Lamb P, Kaur M, Baxter GD, Ribeiro DC. How are running shoes  
562 assessed? A systematic review of characteristics and measurement tools used to  
563 describe running footwear. *J Sports Sci.* 2019;37:14:1617-29.  
564 <https://doi.org/10.1080/02640414.2019.1578449>.
- 565 [29] Ouzzani M, Hammady H, Fedorowicz Z, Elmagarmid A. Rayyan — a web and  
566 mobile app for systematic reviews. *Syst Rev.* 2016;5:210.  
567 <https://doi.org/10.1186/s13643-016-0384-4>.
- 568 [30] Downs SH, Black N. The feasibility of creating a checklist for the assessment of  
569 the methodological quality both of randomized and non-randomised studies of health  
570 care interventions. *J Epidemiol Community Health.* 1998;52:377-84.
- 571 [31] Pairo-t-de-Fontenay B, Willy RW, Elias ARC, Mizner RL, Dube M-O. Running  
572 biomechanics in individuals with anterior cruciate ligament reconstruction: a  
573 systematic review. *Sports Med.* 2019;49:1411-24. <https://doi.org/10.1007/s40279-019-01120-x>.
- 575 [32] Alkjaer T, Simonsen EB, Jørgensen U, Dyhre-Poulsen P. Evaluation of the  
576 walking pattern in two types of patients with anterior cruciate ligament deficiency:  
577 copers and non-copers [published online ahead of print Mar 14, 2003]. *Eur J Appl*  
578 *Physiol.* 2003 May;89(3-4):301-8.
- 579 [33] Alkjaer T, Simonsen EB, Peter Magnusson SP, Aagaard H, Dyhre-Poulsen P.  
580 Differences in the movement pattern of a forward lunge in two types of anterior  
581 cruciate ligament deficient patients: copers and non-copers. *Clin Biomech (Bristol,*  
582 *Avon).* 2002 Oct;17(8):586-93.
- 583 [34] Arnason SM, Birnir B, Guðmundsson TE, Guðnason G, Briem K. Medial  
584 hamstring muscle activation patterns are affected 1-6 years after ACL reconstruction  
585 using hamstring autograft [published online ahead of print Sep 26, 2013]. *Knee Surg*  
586 *Sports Traumatol Arthrosc.* 2014 May;22(5):1024-9. <https://doi.org/10.1007/s00167-013-2696-4>.
- 588 [35] Bryant AL, Newton RU, Steele J. Successful feed-forward strategies following  
589 ACL injury and reconstruction [published online ahead of print Jul 24, 2008]. *J*  
590 *Electromyogr Kinesiol.* 2009 Oct;19(5):988-97.  
591 <https://doi.org/10.1016/j.jelekin.2008.06.001>.

- 592 [36] Cordeiro N, Cortes N, Fernandes O, Diniz A, Pezzarat-Correia P. Dynamic knee  
593 stability and ballistic knee movement after ACL reconstruction: an application on  
594 instep soccer kick [published online ahead of print Feb 12, 2014]. *Knee Surg Sports*  
595 *Traumatol Arthrosc.* 2015 Apr;23(4):1100-6. [https://doi.org/10.1007/s00167-014-](https://doi.org/10.1007/s00167-014-2894-8)  
596 2894-8.
- 597 [37] Dashti Rostami K, Naderi K, Thomas A. Hip abductor and adductor muscles  
598 activity patterns during landing after anterior cruciate ligament injury. *J Sport Rehab.*  
599 2019;28(8):871-6.
- 600 [38] Jordan MJ, Aagaard P, Herzog W. Asymmetry and thigh muscle coactivity in  
601 fatigued anterior cruciate ligament-reconstructed elite skiers. *Med Sci Sports Exerc.*  
602 2017;49(1):11-20.
- 603 [39] Lessi GC, Dos Santos AF, Batista LF, de Oliveira GC, Serrão FV. Effects of  
604 fatigue on lower limb, pelvis and trunk kinematics and muscle activation: Gender  
605 differences [published online ahead of print Nov 9, 2016]. *J Electromyogr Kinesiol.*  
606 2017;32:9-14. <https://doi.org/10.1016/j.jelekin.2016.11.001>.
- 607 [40] Oliver G, Portabella F, Hernandez JA. A comparative study of the neuromuscular  
608 response during a dynamic activity after anterior cruciate ligament reconstruction  
609 [published online ahead of print Oct 26, 2018]. *Eur J Orthop Surg Traumatol.*  
610 2019;29(3):633-8. <https://doi.org/10.1007/s00590-018-2334-4>.
- 611 [41] Ortiz A, Capo-Lugo CE, Venegas-Rios HL. Biomechanical deficiencies in women  
612 with semitendinosus-gracilis anterior cruciate ligament reconstruction during drop  
613 jumps [published online ahead of print Jul 17, 2014]. *PM&R.* 2014;6(12):1097-106.  
614 <https://doi.org/10.1016/j.pmrj.2014.07.003>.
- 615 [42] Patras K, Ziogas G, Ristanis S, Tsepis E, Stergiou N, Georgoulis AD. ACL  
616 reconstructed patients with a BPTB graft present an impaired vastus lateralis  
617 neuromuscular response during high intensity running [published online ahead of  
618 print Mar 12, 2010]. *J Sci Med Sport.* 2010;13(6):573-7.  
619 <https://doi.org/10.1016/j.jsams.2009.12.001>.
- 620 [43] Patras K, Ziogas G, Ristanis S, Tsepis E, Stergiou N, Georgoulis AD. High  
621 intensity running results in an impaired neuromuscular response in ACL  
622 reconstructed individuals [published online ahead of print Jun 4, 2009]. *Knee Surg*

623 Sports Traumatol Arthrosc. 2009;17(8):977-84. [https://doi.org/10.1007/s00167-009-](https://doi.org/10.1007/s00167-009-0822-0)  
624 0822-0.

625 [44] Pincheira PA, Silvestre R, Armijo-Olivo S, Guzman-Venegas R. Ankle  
626 perturbation generates bilateral alteration of knee muscle onset times after unilateral  
627 anterior cruciate ligament reconstruction. PeerJ. 2018.  
628 <https://doi.org/10.7717/peerj.5310>.

629 [45] Rudolph KS, Axe MJ, Buchanan TS, Scholz JP, Snyder-Mackler L. Dynamic  
630 stability in the anterior cruciate ligament deficient knee. Knee Surg Sports Traumatol  
631 Arthrosc. 2001;9(2):62-71.

632 [46] Rudolph KS, Axe MJ, Snyder-Mackler L. Dynamic stability after ACL injury: who  
633 can hop? Knee Surg Sports Traumatol Arthrosc. 2000;8(5):262-9.  
634 <https://doi.org/10.1007/s001670000130>.

635 [47] Rudolph KS, Snyder-Mackler L. Effect of dynamic stability on a step task in ACL  
636 deficient individuals. J Electromyogr Kinesiol. 2004;14(5):565-75.

637 [48] Swanik CB, Lephart SM, Swanik KA, Stone DA, Fu FH. Neuromuscular dynamic  
638 restraint in women with anterior cruciate ligament injuries. Clin Orthop Relat Res.  
639 2004;425:189-99.

640 [49] Briem K, Ragnarsdóttir AM, Árnason SI, Sveinsson T. Altered medial versus  
641 lateral hamstring muscle activity during hop testing in female athletes 1-6 years after  
642 anterior cruciate ligament reconstruction [published online ahead of print Sep 24,  
643 2014]. Knee Surg Sports Traumatol Arthrosc. 2016 Jan;24(1):12-7.  
644 <https://doi.org/10.1007/s00167-014-3333-6>.

645 [50] Lessi GC, Silva RS, Serrão FV. Comparison of the effects of fatigue on  
646 kinematics and muscle activation between men and women after anterior cruciate  
647 ligament reconstruction [published online ahead of print Feb 5, 2018]. *Phys Ther*  
648 *Sport*. 2018;31:29-34. <https://doi.org/10.1016/j.ptsp.2018.01.009>.

649 [51] Lustosa LP, Ocarino JM, de Andrade MA, Pertence AE, Bittencourt NF, Fonseca  
650 ST. Muscle co-contraction after anterior cruciate ligament reconstruction: Influence of  
651 functional level [published online ahead of print Oct 5, 2011]. J Electromyogr Kinesiol.  
652 2011;21(6):1050-5. <https://doi.org/10.1016/j.jelekin.2011.09.001>.

653 [52] Nyland J, Klein S, Caborn DN. Lower extremity compensatory neuromuscular  
654 and biomechanical adaptations 2 to 11 years after anterior cruciate ligament  
655 reconstruction [published online ahead of print Jun 16, 2010]. *Arthroscopy*.  
656 2010;26(9):1212-25. <https://doi.org/10.1016/j.arthro.2010.01.003>.

657 [53] Nyland J, Mauser N, Caborn DN. Sports involvement following ACL  
658 reconstruction is related to lower extremity neuromuscular adaptations, subjective  
659 knee function and health locus of control [published online ahead of print Jan 16,  
660 2013]. *Knee Surg Sports Traumatol Arthrosc*. 2013;21(9):2019-28.  
661 <https://doi.org/10.1007/s00167-013-2366-6>.

662 [54] Nyland J, Wera J, Klein S, Caborn DN. Lower extremity neuromuscular  
663 compensations during instrumented single leg hop testing 2-10 years following ACL  
664 reconstruction [published online ahead of print Jul 31, 2014]. *Knee*. 2014;21(6):1191-  
665 7. <https://doi.org/10.1016/j.knee.2014.07.017>.

666 [55] Boerboom AL, Hof AL, Halbertsma JP, van Raaij JJ, Schenk W, Diercks RL, et  
667 al. Atypical hamstrings electromyographic activity as a compensatory mechanism in  
668 anterior cruciate ligament deficiency. *Knee Surg Sports Traumatol Arthrosc*. 2001  
669 Jul;9(4):211-6.

670 [56] Bulgheroni P, Bulgheroni MV, Andrini L, Guffanti P, Giughello A. Gait patterns  
671 after anterior cruciate ligament reconstruction. *Knee Surg Sports Traumatol Arthrosc*.  
672 1997;5(1):14-21.

673 [57] Gokeler A, Hof AL, Arnold MP, Dijkstra PU, Postema K, Otten E. Abnormal  
674 landing strategies after ACL reconstruction [published online ahead of print Feb 2,  
675 2009]. *Scand J Med Sci Sports*. 2010;20(1):e12-9. <https://doi.org/10.1111/j.1600-0838.2008.00873.x>.

677 [58] Hansen C, Einarson E, Thomson A, Whiteley R, Witvrouw E. Hamstring and calf  
678 muscle activation as a function of bodyweight support during treadmill running in ACL  
679 reconstructed athletes [published online ahead of print Jul 29, 2017]. *Gait Posture*.  
680 2017;58:154-8. <https://doi.org/10.1016/j.gaitpost.2017.07.120>.

681 [59] Klyne DM, Keays SL, Bullock-Saxton JE, Newcombe PA. The effect of anterior  
682 cruciate ligament rupture on the timing and amplitude of gastrocnemius muscle  
683 activation: a study of alterations in EMG measures and their relationship to knee joint

684 stability [published online ahead of print Feb 21, 2012]. *J Electromyogr Kinesiol.* 2012  
685 Jun;22(3):446-55. <https://doi.org/10.1016/j.jelekin.2012.01.013>.

686 [60] Knoll Z, Kocsis L, Kiss RM. Gait patterns before and after anterior cruciate  
687 ligament reconstruction [published online ahead of print Oct 29, 2003]. *Knee Surg*  
688 *Sports Traumatol Arthrosc.* 2004;12(1):7-14.

689 [61] Kuster M, Sakurai S, Wood GA. The anterior cruciate ligament-deficient knee:  
690 compensatory mechanisms during downhill walking. *Knee* 1995;2(2):105-11. doi:  
691 10.1016/0968-0160(95)00021-G.

692 [62] Madhavan S, Shields RK. Neuromuscular responses in individuals with anterior  
693 cruciate ligament repair. *Clin Neurophysiol* 2011;122:997-1004.

694 [63] Ortiz A, Olson S, Libby CL, Trudelle-Jackson E, Kwon YH, Etnyre B, et al.  
695 Landing mechanics between noninjured women and women with anterior cruciate  
696 ligament reconstruction during 2 jump tasks [published online ahead of print Oct 16,  
697 2007]. *Am J Sports Med* 2008;36(1):149-57.

698 [64] Ortiz A, Olson S, Trudelle-Jackson E, Rosario M, Venegas HL. Landing  
699 mechanics during side hopping and crossover hopping maneuvers in noninjured  
700 women and women with anterior cruciate ligament reconstruction. *PM&R* 2011;3:13-  
701 20. doi: 10.1016/j.pmrj.2010.10.018.

702 [65] Patras K, Zampeli F, Ristanis S, Tsepis E, Ziogas G, Stergiou N, et al.  
703 Hamstring-Dominant Strategy of the Bone–Patellar Tendon–Bone Graft Anterior  
704 Cruciate Ligament–Reconstructed Leg Versus Quadriceps-Dominant Strategy of the  
705 Contralateral Intact Leg During High-Intensity Exercise in Male Athletes. *Arthroscopy*  
706 2012;28(9):1262-70.

707 [66] Swanik CB, Lephart SM, Giraldo JL, Demont RG, Fu FH. Reactive muscle firing  
708 of anterior cruciate ligament-injured females during functional activities. *J Athl Train*  
709 1999;34(2):121-9.

710 [67] Zebis MK, Andersen CH, Bencke J, Ørntoft C, Linnebjerg C, Hölmich P, et al.  
711 Neuromuscular coordination deficit persists 12 Months after ACL reconstruction but  
712 can be modulated by 6 Weeks of Kettlebell training: A case study in Women's Elite

713 Soccer [published online ahead of print Jan 18, 2017]. Case Rep Orthop  
714 2017;4269575. doi: 10.1155/2017/4269575.

715 [68] Busch A, Henle P, Boesch L, Blasimann A, Baur H. Neuromuscular control in  
716 patients with acute ACL injury during stair ascent—A pilot study. Sports Traumatol  
717 Sports Injury June 2019;35(2):158-65. doi: 10.1016/j.orthtr.2019.04.002

718 [69] Price RJ, Hawkins RD, Hulse MA, Hodson A. The Football Association medical  
719 research programme: an audit of injuries in academy youth football. Br J Sports Med  
720 2004;38(4):466-71.

721 [70] Burgi CR, Peters S, Ardern CL, Magill JR, Gomez CD, Sylvain J, et al. Which  
722 criteria are used to clear patients to return to sport after primary ACL reconstruction?  
723 A scoping review [published online ahead of print Feb 2, 2019]. 2019: Br J Sports  
724 Med 2019 Feb 2. pii: bjsports-2018-099982. doi: 10.1136/bjsports-2018-099982.

725 [71] Belanger L, Burt D, Callaghan J, Clifton S, Gleberzon BJ. Anterior cruciate  
726 ligament laxity related to the menstrual cycle: an updated systematic review of the  
727 literature. J Can Chiropr Assoc 2013;57:76-86.

728 [72] Pappas E, Carpes FP. Lower extremity kinematic asymmetry in male and female  
729 athletes performing jump-landing tasks. J Sci Med Sport 2012;15(1):87–92. doi:  
730 10.1016/j.jsams.2011.07.008.

731 [73] Pollard CD, Sigward SM, Powers CM. Limited hip and knee flexion during  
732 landing is associated with increased frontal plane knee motion and moments. Clin  
733 Biomech 2010;25(2):142–6. doi: 10.1016/j.clinbiomech.2009.10.005.

734 [74] Nagano Y, Ida H, Akai M, Fukubayashi T. Gender differences in knee kinematics  
735 and muscle activity during single limb drop landing. Knee 2007;14(3):218–23. doi:  
736 10.1016/j.knee.2006.11.008.

737 [75] Sigward SM, Powers CM. Loading characteristics of females exhibiting  
738 excessive valgus moments during cutting. Clin Biomech 2007;22(7): 827–33. doi:  
739 10.1016/j.clinbiomech.2007.04.003.

740 [76] Tan SH, Lau BP, Khin LW, Lingaraj K. The importance of patient sex in the  
741 outcomes of anterior cruciate ligament reconstructions: a systematic review and

742 meta-analysis. Am J Sports Med 2016;44(1):242-54. doi:  
743 10.1177/0363546515573008.

744 [77] Monk AP, Davies LJ, Hopewell S, Harris K, Beard DJ, Price AJ. Surgical versus  
745 conservative interventions for treating anterior cruciate ligament injuries. Cochrane  
746 Database Syst Rev 2016;4. Art. No.: CD011166. doi:  
747 10.1002/14651858.CD011166.pub2.

748 [78] Hermens H, Freriks B, Disselhorst-Klug C, Rau G. Development of  
749 recommendations for SEMG sensor and sensor placement procedures. J  
750 Electromyogr Kinesiol 2000;10:361–74.

751 [79] Losciale JM, Zdeb RM, Ledbetter L, Reiman MP, Sell TC. The association  
752 between passing return-to-sport criteria and second anterior cruciate ligament injury  
753 risk: a systematic review with meta-analysis. J Orthop Sports Phys Ther  
754 2018;49(2):43-54. doi: 10.2519/jospt.2019.8190.

755

#### 756 **Web reference**

757 International prospective register of systematic reviews (PROSPERO).  
758 <https://www.crd.york.ac.uk/PROSPERO/index.php#index.php>; n.d. [accessed 11 July  
759 2020]

760 Table 1: Overview of PICOS criteria for key word definitions

| <b>Parameter</b>        | <b>Criteria</b>                                                                                                                                                                                                                                                                                                                                                                                                                                      |
|-------------------------|------------------------------------------------------------------------------------------------------------------------------------------------------------------------------------------------------------------------------------------------------------------------------------------------------------------------------------------------------------------------------------------------------------------------------------------------------|
| <i>Participants (P)</i> | Adult people (age of 18 – 65 years) who sustained an ACL injury, either treated conservatively or surgically (repaired with an autograft)                                                                                                                                                                                                                                                                                                            |
| <i>Intervention (I)</i> | Assessment of neuromuscular control, active knee stability, sensorimotor control, active stability of the lower limb or similar during dynamic activities                                                                                                                                                                                                                                                                                            |
| <i>Control (C)</i>      | Uninjured limb / contralateral side or contralateral lower limb of the ACL-injured participant, or a healthy control group                                                                                                                                                                                                                                                                                                                           |
| <i>Outcomes (O)</i>     | Any EMG-related outcome describing neuromuscular activity/control in domains of time, amplitude etc.; parameters describing EMG activity of lower limb muscles; related to EMG variables, such as amplitude, timing, mean or peak activity, duration of activity, onset and offset / on-off-pattern respectively, pre-activity, latency, reflex response according to Shanbehzadeh et al., 2017 <sup>20</sup> and Theisen et al., 2016 <sup>24</sup> |
| <i>Study design (S)</i> | Any laboratory or interventional study, cross-sectional or longitudinal, randomized controlled trials, clinically controlled trials without randomization, laboratory/experimental controlled trials etc.                                                                                                                                                                                                                                            |



761 Table 2: Risk of Bias assessment with the adapted Downs & Black checklist [28,30,31]

| Authors & Year                           | Design | Reporting |   |   |   |   |   |   | External validity |    |    |    |    | Internal validity |    |    |    |    |    |    | Power | Score | RoB |    |    |    |        |
|------------------------------------------|--------|-----------|---|---|---|---|---|---|-------------------|----|----|----|----|-------------------|----|----|----|----|----|----|-------|-------|-----|----|----|----|--------|
|                                          |        | 1         | 2 | 3 | 4 | 5 | 6 | 7 | 10                | 11 | 12 | 13 | 14 | 15                | 16 | 17 | 18 | 20 | 21 | 22 |       |       |     | 23 | 24 | 25 | 26     |
| <i>Busch et al. (2019) [17]</i>          | CCS    | 1         | 1 | 1 | 1 | 2 | 1 | 1 | 1                 | X  | 0  | 1  | X  | X                 | 1  | X  | 1  | 1  | X  | X  | X     | X     | 1   | X  | 0  | 14 | medium |
| <i>Alkjaer et al. (2003) [32]</i>        | CCS    | 1         | 1 | 1 | 1 | 2 | 1 | 1 | 1                 | X  | 0  | 1  | X  | X                 | 1  | X  | 1  | 1  | X  | X  | X     | X     | 1   | X  | 0  | 14 | medium |
| <i>Alkjaer et al. (2002) [33]</i>        | CCS    | 1         | 1 | 1 | 1 | 2 | 1 | 1 | 1                 | X  | 0  | 1  | X  | X                 | 1  | X  | 1  | 1  | X  | X  | X     | X     | 1   | 1  | 0  | 15 | medium |
| <i>Arnason et al. (2014) [34]</i>        | CCS    | 1         | 1 | 1 | 1 | 2 | 1 | 1 | 1                 | X  | 0  | 1  | X  | X                 | 1  | X  | 1  | 1  | 1  | X  | X     | X     | 1   | X  | 0  | 15 | medium |
| <i>Bryant et al. (2009) [35]</i>         | CCS    | 1         | 1 | 1 | 1 | 2 | 1 | 1 | 1                 | X  | 0  | 1  | X  | X                 | 1  | 1  | 1  | 1  | 1  | X  | X     | X     | 1   | X  | 0  | 16 | medium |
| <i>Cordeiro et al. (2015) [36]</i>       | CCS    | 1         | 1 | 1 | 1 | 2 | 1 | 1 | 1                 | X  | 0  | 0  | X  | X                 | 1  | X  | 1  | 1  | 1  | X  | X     | X     | X   | X  | 1  | 14 | medium |
| <i>Dashti Rostami et al. (2019) [37]</i> | CCS    | 1         | 1 | 1 | 1 | 2 | 1 | 1 | 1                 | X  | 0  | 1  | X  | X                 | 1  | 1  | 1  | 1  | X  | X  | X     | X     | 1   | X  | 0  | 15 | medium |
| <i>Jordan et al. (2016) [38]</i>         | CCS    | 1         | 1 | 1 | 1 | 2 | 1 | 1 | 1                 | X  | 0  | 0  | X  | X                 | 1  | X  | 1  | 1  | 1  | X  | X     | X     | X   | X  | 1  | 14 | medium |
| <i>Lessi et al. (2017) [39]</i>          | CCS    | 1         | 1 | 1 | 1 | 2 | 1 | 1 | 0                 | X  | 0  | 1  | X  | X                 | 1  | X  | 1  | 1  | X  | X  | X     | X     | 1   | X  | 1  | 14 | medium |
| <i>Oliver et al. (2018) [40]</i>         | P, CCS | 1         | 1 | 1 | 1 | 1 | 1 | 1 | 1                 | X  | 0  | 1  | X  | X                 | 1  | 1  | 1  | 1  | IC | 1  | X     | X     | IC  | X  | 0  | 14 | medium |
| <i>Ortiz et al. (2014) [41]</i>          | CCS    | 1         | 1 | 1 | 1 | 2 | 1 | 1 | 1                 | X  | 0  | 1  | X  | X                 | 1  | X  | 1  | 1  | 1  | X  | X     | X     | 0   | 1  | 0  | 15 | medium |
| <i>Patras et al. (2010) [42]</i>         | CCS    | 1         | 1 | 1 | 1 | 2 | 1 | 1 | 1                 | 0  | 0  | 0  | X  | X                 | 1  | X  | 1  | 1  | X  | X  | X     | X     | 1   | X  | 0  | 13 | medium |

|                                               |        |   |   |   |   |   |   |   |   |   |   |   |   |   |   |   |   |   |    |   |   |   |    |   |   |    |        |
|-----------------------------------------------|--------|---|---|---|---|---|---|---|---|---|---|---|---|---|---|---|---|---|----|---|---|---|----|---|---|----|--------|
| <i>Patras et al. (2009) [43]</i>              | CCS    | 1 | 1 | 1 | 1 | 2 | 1 | 1 | 1 | X | 0 | 0 | X | X | 1 | 0 | 1 | 1 | IC | X | X | X | IC | X | 0 | 12 | medium |
| <i>Pincheira et al. (2018) [44]</i>           | CCS    | 1 | 1 | 1 | 1 | 2 | 1 | 1 | 0 | 0 | 0 | 0 | X | X | 1 | X | 1 | 1 | 1  | X | X | X | X  | X | 1 | 13 | medium |
| <i>Rudolph et al. (2001) [45]</i>             | CCS    | 1 | 1 | 1 | 1 | 1 | 1 | 1 | 1 | 1 | 1 | 1 | X | X | 1 | X | 1 | 1 | 1  | X | X | X | X  | X | 0 | 15 | medium |
| <i>Rudolph et al. (2000) [46]</i>             | CCS    | 1 | 1 | 1 | 1 | 1 | 1 | 1 | 1 | 1 | 1 | 1 | X | X | 1 | X | 1 | 1 | 1  | X | X | X | X  | X | 0 | 15 | medium |
| <i>Rudolph&amp;Snyder-Mackler (2004) [47]</i> | CCS    | 1 | 1 | 1 | 1 | 1 | 1 | 0 | 1 | 1 | 1 | 0 | X | X | 1 | X | 1 | 1 | 1  | X | X | X | X  | X | 0 | 13 | medium |
| <i>Swanik et al. (2004) [48]</i>              | CCS    | 1 | 1 | 1 | 1 | 2 | 1 | 1 | 1 | X | 0 | 0 | X | X | 1 | X | 1 | 1 | 0  | X | X | X | X  | X | 1 | 13 | medium |
| <i>Briem et al. (2016) [49]</i>               | CCS    | 1 | 1 | 1 | 1 | 2 | 1 | 1 | 1 | 1 | 0 | 1 | X | X | 1 | X | 1 | 1 | 1  | 1 | X | X | 1  | X | 1 | 18 | low    |
| <i>Lessi et al. (2018) [50]</i>               | R, CCS | 1 | 1 | 1 | 1 | 2 | 1 | 1 | 1 | X | 0 | 1 | X | X | 1 | 1 | 1 | 1 | 1  | 0 | X | X | 1  | X | 1 | 17 | low    |
| <i>Lustosa et al. (2011) [51]</i>             | CCS    | 1 | 1 | 1 | 1 | 1 | 1 | 1 | 1 | 1 | 1 | 0 | X | X | 1 | 1 | 1 | 1 | 1  | 1 | X | X | 1  | X | 0 | 17 | low    |
| <i>Nyland et al. (2010) [52]</i>              | CCS    | 1 | 1 | 1 | 1 | 2 | 1 | 1 | 1 | 1 | 1 | 1 | X | X | 1 | 1 | 1 | 1 | 0  | 1 | X | X | 0  | X | 0 | 17 | low    |
| <i>Nyland et al. (2013) [53]</i>              | R, CCS | 1 | 1 | 1 | 1 | 2 | 1 | 1 | 1 | 1 | 0 | 1 | X | X | 1 | 1 | 1 | 1 | 1  | 1 | X | X | 1  | X | 0 | 18 | low    |
| <i>Nyland et al. (2014) [54]</i>              | CS     | 1 | 1 | 1 | 1 | 2 | 1 | 1 | 1 | 1 | 0 | 1 | X | X | 1 | 1 | 1 | 1 | X  | 1 | X | X | 1  | X | 0 | 17 | low    |
| <i>Boerboom et al. (2001) [55]</i>            | CCS    | 1 | 1 | 1 | 1 | 2 | 1 | 0 | 0 | X | X | 1 | X | X | 1 | 0 | 1 | 0 | 0  | X | X | X | 1  | X | 0 | 11 | high   |
| <i>Bulgheroni et al. (1997) [56]</i>          | CCS    | 1 | 1 | 0 | 1 | 1 | 1 | 0 | 0 | X | X | 1 | X | X | 1 | 0 | 1 | 1 | 0  | 0 | X | X | X  | X | 0 | 9  | high   |
| <i>Gokeler et al. (2010) [57]</i>             | CCS    | 1 | 1 | 1 | 1 | 1 | 1 | 1 | 1 | X | 0 | 1 | X | X | 1 | X | 1 | 1 | X  | X | X | X | X  | X | 0 | 12 | high   |

|                                         |     |   |   |   |   |   |   |   |   |   |   |   |   |   |   |   |   |   |   |   |   |   |   |   |    |      |      |
|-----------------------------------------|-----|---|---|---|---|---|---|---|---|---|---|---|---|---|---|---|---|---|---|---|---|---|---|---|----|------|------|
| <i>Hansen et al. (2017) [58]</i>        | CCS | 1 | 1 | 1 | 1 | 2 | 1 | 1 | 1 | X | 0 | 0 | X | X | 1 | X | 1 | 1 | X | X | X | X | X | 0 | 12 | high |      |
| <i>Klyne et al. (2012) [59]</i>         | CCS | 1 | 1 | 0 | 1 | 1 | 1 | 1 | 1 | 1 | 0 | 1 | X | X | 1 | X | 1 | 1 | X | X | X | X | X | 0 | 12 | high |      |
| <i>Knoll et al. (2004) [60]</i>         | CCS | 1 | 1 | 1 | 1 | 2 | 0 | 0 | 1 | X | X | 0 | X | X | 1 | X | 1 | 1 | 0 | X | X | X | X | 0 | 10 | high |      |
| <i>Kuster et al. (1995) [61]</i>        | CCS | 1 | 1 | 1 | 1 | 2 | 1 | 1 | 0 | X | X | 1 | X | X | 1 | X | 1 | 1 | 0 | X | X | X | X | 0 | 12 | high |      |
| <i>Madhavan&amp;Shields (2011) [62]</i> | CCS | 1 | 1 | 1 | 1 | 2 | 0 | 0 | 0 | 0 | 0 | 0 | X | X | 1 | X | 1 | 1 | X | X | X | X | X | 0 | 9  | high |      |
| <i>Ortiz et al. (2008) [63]</i>         | CCS | 1 | 1 | 1 | 1 | 2 | 0 | 0 | 1 | X | 0 | 1 | X | X | 1 | X | 1 | 1 | X | X | X | X | 0 | X | 0  | 11   | high |
| <i>Ortiz et al. (2011) [64]</i>         | CCS | 1 | 1 | 1 | 1 | 2 | 0 | 0 | 0 | X | 0 | 1 | X | X | 1 | X | 1 | 1 | X | X | X | X | 0 | X | 0  | 10   | high |
| <i>Patras et al. (2012) [65]</i>        | CCS | 1 | 1 | 0 | 1 | 2 | 0 | 1 | 0 | X | 0 | 0 | X | X | 0 | X | 1 | 1 | X | X | X | X | X | 0 | 8  | high |      |
| <i>Swanik et al. (1999) [66]</i>        | CCS | 1 | 1 | 1 | 1 | 2 | 0 | 1 | 0 | X | 0 | 0 | X | X | 1 | X | 1 | 1 | 0 | X | X | X | X | 0 | 10 | high |      |
| <i>Zebis et al. (2017) [67]</i>         | CS  | 1 | 1 | 1 | 1 | 2 | 1 | 0 | 0 | X | 0 | 1 | X | X | 1 | X | 1 | 1 | X | X | X | X | X | 0 | 11 | high |      |

762

763 Abbreviations: CCS = case-control study, CS = case study, IC = intrasubject comparison (injured leg versus healthy leg), P = prospective, R = retrospective (secondary analysis), RoB = risk of bias, X =

764 not applicable or unclear

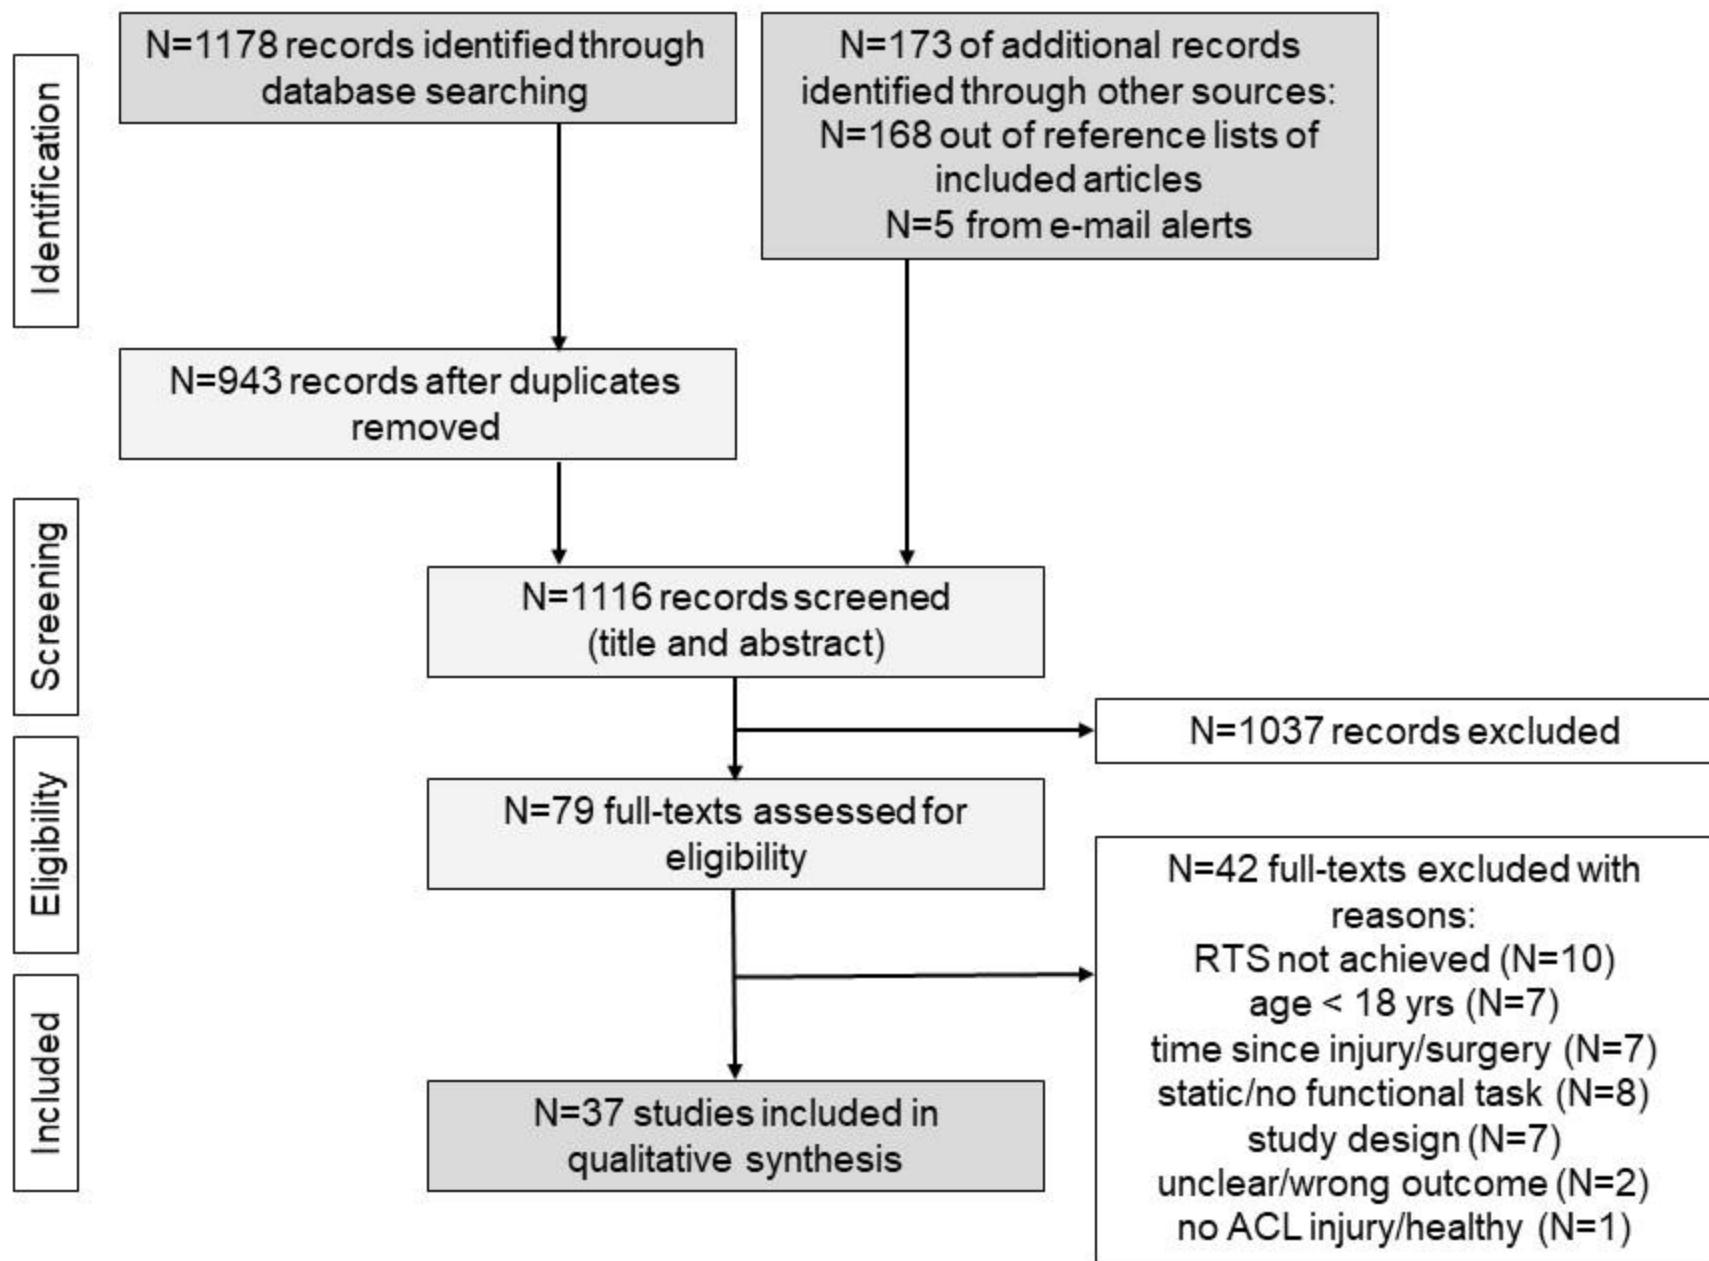

Source: https://medrxiv.org/content/10.1101/2020.03.05.20031617v2.full.pdf
